# Supplementary material for: The Influenza Virus Protein PB1-F2 Increases Viral Pathogenesis through Neutrophil Recruitment and NK Cells Inhibition
Source: PLOS journal article supplement (doi:10.1371/journal.pone.0165361), 2016-10-31
Supplement: S1 (10.1371/journal.pone.0165361.s001) [file journal.pone.0165361.s001]

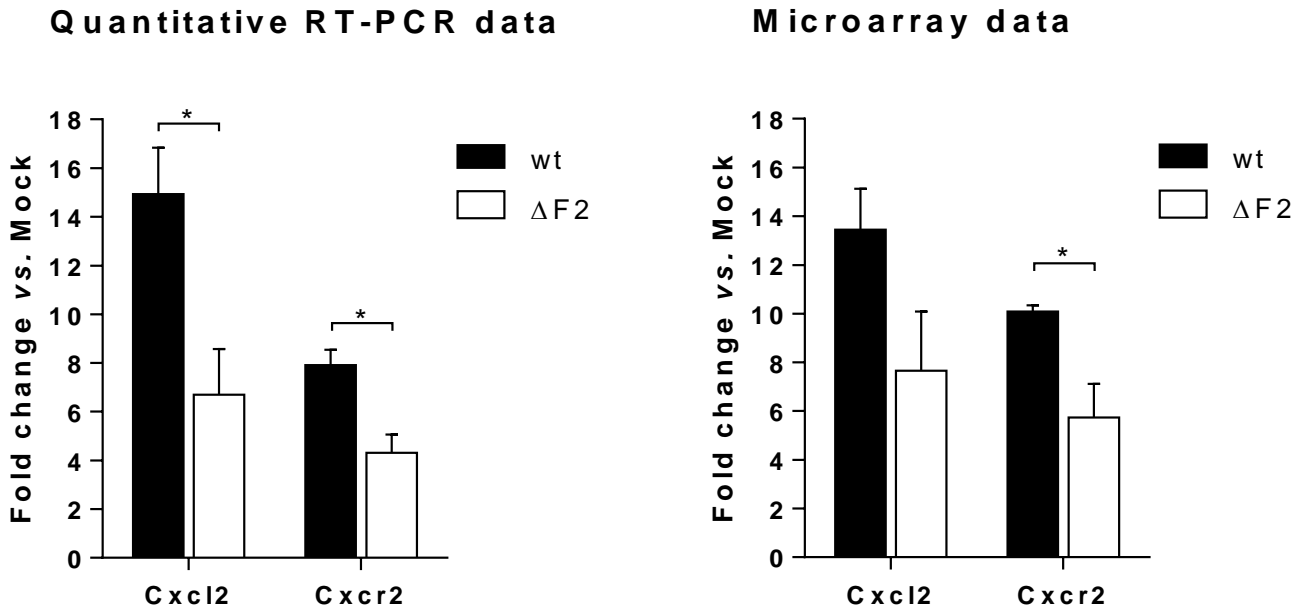

Supplemental Figure S1:  
qRT-PCR were performed to analyze the impact of PB1-F2 expression on host response. Total RNA isolated from lungs of infected mice (day 2pi) were reverse-transcribed and used to quantify expression of chemokine (C-X-C motif) ligand 2 (Cxcl2, Gene ID: 20310) and its receptor chemokine (C-X-C motif) receptor 2 (Cxcr2, Gene ID: 12765). Gene expressions were normalized with the  $\beta$ -actin gene expression level and presented as fold increase relative to mock-treated mice. Data are means  $\pm$  SEM obtained from three mice. Right panel represent the data obtained by microarray experiment made on independent mice. Asterisks (\*) indicates  $p < 0.05$ .
